# Supplementary material
Source: MDPI journal article supplement (https://www.mdpi.com/2413-8851/5/4/82)
Supplement: s1 [file s1]

## **Estimated metric calculations**

(in accordance to *Prezziario della Regione Sicilia*, 2019)

# XLAM

| DESIGNAZIONE DEI LAVORI per <b>Mura in X-Lam (XLAM)</b> |                                                                                                                                                                                                                                                                                                                                                                                                                                                                                                                                                                                                                                                                                                                                                                                                                                                                                                                                                                                                                                                                                                                                                                                                                                                                                                                                                                                                                                                                                                                                                                                                                                                                                                                                                                                                                                                                                                                                          | IMPORTI  |                        |                    |                  |
|---------------------------------------------------------|------------------------------------------------------------------------------------------------------------------------------------------------------------------------------------------------------------------------------------------------------------------------------------------------------------------------------------------------------------------------------------------------------------------------------------------------------------------------------------------------------------------------------------------------------------------------------------------------------------------------------------------------------------------------------------------------------------------------------------------------------------------------------------------------------------------------------------------------------------------------------------------------------------------------------------------------------------------------------------------------------------------------------------------------------------------------------------------------------------------------------------------------------------------------------------------------------------------------------------------------------------------------------------------------------------------------------------------------------------------------------------------------------------------------------------------------------------------------------------------------------------------------------------------------------------------------------------------------------------------------------------------------------------------------------------------------------------------------------------------------------------------------------------------------------------------------------------------------------------------------------------------------------------------------------------------|----------|------------------------|--------------------|------------------|
|                                                         |                                                                                                                                                                                                                                                                                                                                                                                                                                                                                                                                                                                                                                                                                                                                                                                                                                                                                                                                                                                                                                                                                                                                                                                                                                                                                                                                                                                                                                                                                                                                                                                                                                                                                                                                                                                                                                                                                                                                          | unitario | % incidenza manodopera | TOTALE             |                  |
| 1.1.5                                                   | <p>Scavo a sezione obbligata, per qualsiasi finalit , per lavori da eseguirsi in ambito extraurbano, eseguito con mezzo meccanico fino alla profondit  di 2,00 m dal piano di sbancamento o, in mancanza di questo dall'orlo medio del cavo, eseguito a sezione uniforme, a gradoni, anche in presenza di acqua con tirante non superiore a 20 cm, alberi e ceppaie di dimensioni inferiori a quelle delle voci 1.6.1 e 1.6.2, escluse le armature di qualsiasi tipo anche a cassa chiusa, occorrenti per le pareti, compresi il paleggio, il sollevamento, il carico, il trasporto delle materie nell'ambito del cantiere fino alla distanza di 1000 m o l'accatastamento delle materie riutilizzabili lungo il bordo del cavo, gli aggotamenti, la regolarizzazione delle pareti e del fondo eseguita con qualsiasi mezzo, compreso l'onere per il prelievo dei campioni (da effettuarsi in contraddittorio tra la D.L. e l'Impresa), il confezionamento dei cubetti questo da compensarsi a parte con il relativo prezzo (capitolo 20), da sottoporre alle prove di schiacciamento ed ogni altro onere per dare l'opera completa a perfetta regola d'arte. Sono esclusi gli accertamenti e le verifiche tecniche obbligatorie previsti dal C.S.A.</p> <p>2) in rocce lapidee integre con resistenza allo schiacciamento da oltre 4 N/mm  e fino a 10 N/mm  ed in rocce lapidee fessurate di qualsiasi resistenza con superfici di discontinuit  poste a distanza media l'una dall'altra superiore a 30 cm e fino a 50 cm, attaccabili da idoneo mezzo di escavazione di adeguata potenza non inferiore ai 45 kW. La resistenza allo schiacciamento per le rocce lapidee integre sar  determinata su provini da prelevare in numero non inferiore a 5 provini (da 10x10x10 cm) fino ai primi 300 m  di materiale e sar  rideterminato con le stesse modalit  ogni qualvolta sar  riscontrata variazione delle classi di resistenza</p> | m        |   12,70                | 12,86%<br>(  1,63) | 444,50<br>euro   |
| 3.1.1                                                   | <p>Conglomerato cementizio per strutture non armate o debolmente armate, compreso la preparazione dei cubetti, il conferimento in laboratorio per le prove dei materiali, la vibratura dei getti, la lisciatura delle facce apparenti con malta di cemento puro ed ogni altro onere occorrente per dare il conglomerato in sito ed il lavoro eseguito a perfetta regola d'arte, esclusa l'eventuale aggiunta di altri additivi, da computarsi ove necessari ed escluse le casseforme e le barre di armatura.</p> <p>8) per opere in elevazione lavori edili con C 20/25</p>                                                                                                                                                                                                                                                                                                                                                                                                                                                                                                                                                                                                                                                                                                                                                                                                                                                                                                                                                                                                                                                                                                                                                                                                                                                                                                                                                              | m        |   153,36               | 4,90%<br>(  7,51)  | 5.367,60<br>euro |
| 3.2.3                                                   | <p>Casseforme per getti di conglomerati semplici o armati, di qualsiasi forma e dimensione, escluse le strutture intelaiate in cemento armato e le strutture speciali, realizzate con legname o con pannelli di lamiera monolitica d'acciaio rinforzati, di idoneo spessore, compresi piantane (o travi), morsetti a ganascia, morsetti tendifilo e tenditori, cunei bloccaggio, compreso altres  ogni altro onere e magistero per controventatura, disarmo, pulitura e accatastamento del materiale, il tutto eseguito a perfetta regola d'arte, misurate per la superficie dei casseri a contatto dei conglomerati.</p>                                                                                                                                                                                                                                                                                                                                                                                                                                                                                                                                                                                                                                                                                                                                                                                                                                                                                                                                                                                                                                                                                                                                                                                                                                                                                                                | m        |   23,91                | 24,70%<br>(  5,91) | 358,65<br>euro   |
| 3.2.4                                                   | <p>Fornitura e collocazione di rete d'acciaio elettrosaldata a fili nervati ad aderenza migliorata Classi B450 C o B450 A controllato in stabilimento, con diametro non superiore a 8 mm, di caratteristiche conformi alle norme tecniche vigenti, comprese le saldature ed il posizionamento in opera, gli eventuali tagli a misura, legature di filo di ferro, i distanziatori, gli sfridi, eventuali sovrapposizioni anche se non prescritte nei disegni esecutivi, compreso l'onere per la formazione dei provini ed il conferimento in laboratorio per le prove dei materiali previste dalle norme vigenti in materia.</p>                                                                                                                                                                                                                                                                                                                                                                                                                                                                                                                                                                                                                                                                                                                                                                                                                                                                                                                                                                                                                                                                                                                                                                                                                                                                                                          | kg       |   2,50                 | 20,14%<br>(  0,50) | 2.040 euro       |

| DESIGNAZIONE DEI LAVORI |                                                                                                                                                                                                                                                                                                                                                                                                                                                                                                                                                                                                                                                                                                                                                                                                                                                                                                                                                                                                                                                                                                                                                                                                                                                                                                                                                                                                                                                                                      | IMPORTI  |                        |                     |                  |
|-------------------------|--------------------------------------------------------------------------------------------------------------------------------------------------------------------------------------------------------------------------------------------------------------------------------------------------------------------------------------------------------------------------------------------------------------------------------------------------------------------------------------------------------------------------------------------------------------------------------------------------------------------------------------------------------------------------------------------------------------------------------------------------------------------------------------------------------------------------------------------------------------------------------------------------------------------------------------------------------------------------------------------------------------------------------------------------------------------------------------------------------------------------------------------------------------------------------------------------------------------------------------------------------------------------------------------------------------------------------------------------------------------------------------------------------------------------------------------------------------------------------------|----------|------------------------|---------------------|------------------|
|                         |                                                                                                                                                                                                                                                                                                                                                                                                                                                                                                                                                                                                                                                                                                                                                                                                                                                                                                                                                                                                                                                                                                                                                                                                                                                                                                                                                                                                                                                                                      | unitario | % incidenza manodopera | TOTALE              |                  |
| 5.1.9                   | Fornitura, trasporto e posa in opera di pavimentazione per interni con elementi in monostrato omogeneo, di colore a scelta della D.L., dello spessore non inferiore a 20 mm realizzati con impasto costituito da materiale lavico di granulometria da 0,1 a 4 mm e cemento ad alta resistenza (C 40/50) e pressati (30 kN per elemento) oppure in micromarmo bianco o colorato e con superfici in vista da levigare e lucidare dopo la posa e da compensarsi a parte. I pavimenti devono essere posti in opera con collanti o malta cementizia su idoneo massetto da compensarsi a parte, compresa la boiacatura di cemento, tagli, sfridi ed ogni altro onere e magistero per dare l'opera completa a perfetta regola d'arte.                                                                                                                                                                                                                                                                                                                                                                                                                                                                                                                                                                                                                                                                                                                                                       |          |                        |                     |                  |
|                         | 1) per elementi di formato 40x40 cm                                                                                                                                                                                                                                                                                                                                                                                                                                                                                                                                                                                                                                                                                                                                                                                                                                                                                                                                                                                                                                                                                                                                                                                                                                                                                                                                                                                                                                                  | m²       | € 67,94                | 20,25%<br>(€ 13,76) | 3.804,64<br>euro |
| 1.1.0                   | Fornitura e posa in opera di pareti portanti modulari a marcatura CE spessore compreso fra cm 10 e cm 14, perimetrali e interne, eseguite con pannelli X-LAM in legno di conifera (abete rosso in classe C24) composto da 5 strati di tavole reciprocamente incrociati ed incollati (colla PUR senza formaldeide), superfici non a vista (NSI), assemblate tra loro in cantiere, complete di idonea ferramenta da calcolo, guarnizioni, nastrature, guaina bituminosa alla base delle pareti, fissaggio a terra con ancoranti meccanici e chimici, formazione forature per ricavo porte e finestre, travi passanti e strutture varie, ed ogni altro onere inerente per dare un lavoro finito a perfetta regola d'arte.<br>Misurazione vuoto per pieno con deduzione dei fori superiori a mq. 4,00.                                                                                                                                                                                                                                                                                                                                                                                                                                                                                                                                                                                                                                                                                   | m²       | € 103,00               | 20%<br>(€ 20,60)    | 8.153,48<br>euro |
| 1.1.3                   | Fornitura e posa in opera di controparete lato interno pareti esterne X-LAM eseguita a secco con:<br>- montanti in lamiera zincata spessore cm 5 in adiacenza alla parete x-lam ad interasse cm 60 con forature predisposte per il passaggio di canalizzazioni ed impiantistica varia;<br>- completamento degli interspazi tra i montanti dopo il posizionamento degli impianti eseguito a totale riempimento con pannello in fibra minerale mm 45;<br>- posizionamento di 1° lastra in gesso-fibra rinforzata di spessore mm 12,5 con barriera vapore, unite una all'altra e avvitate ai montanti sottostanti;<br>- posizionamento di 2° lastra sfalsata sovrapposta in cartongesso di mm 12,5 unite una all'altra e fissate con idonee viti;<br>- garzatura e stuccatura delle giunzioni e delle viti di fissaggio;<br>- foratura e riquadratura delle scatole di derivazione e portafrutti degli impianti, porte e finestre, travi passanti, ecc.<br>Compreso ogni altro onere inerente per dare un lavoro finito a perfetta regola d'arte.<br>Misurazione vuoto per pieno con deduzione dei fori superiori a mq. 4,00.                                                                                                                                                                                                                                                                                                                                                           | m²       | € 22,00                | 20%<br>(€ 4,40)     | 1.741,52<br>euro |
| 3.19.0                  | Isolamento termico esterno, "cappotto", eseguito su pannelli portanti in legno X-LAM, costituito da:<br>- zoccolatura di altezza cm 60 in pannelli di polistirene a cellule chiuse con densità circa 30 Kg/m3, spessore cm 16, compreso profilo in acciaio zincato posto alla base del rivestimento, opportunamente fissato alla struttura;<br>- restante superficie in pannelli in lana di roccia a doppia densità, pannello esterno di densità 100 kg/mc e pannello interno densità kg/mc 35, spessore complessivo cm 16, posizionati con giunti sfalsati, ancorati alla sottostante struttura lignea con speciali chiodi in acciaio con rondella in ragione di 4/6 al metro quadrato; rivestimento dei contorni dei fori di porte e finestre in battuta al serramento e dei ponti termici in genere, con pannello dello spessore di cm 6/8; applicazione dall'alto verso il basso di rete di tessuto imputrescibile di fibra di vetro tessile apprettata, peso kg/mq 0,16, maglia cm 0,5x0,5 posta in opera con uno strato sottile di fondo e successiva spalmatura finale a spessore di speciale adesivo ad elevata resistenza ed alto potere ancorante rasato a ferro in superficie; applicazione di rivestimento murale plastico di finitura del tipo a grana media a completamento dell'isolamento, esteso a tutte le superfici, con coloritura a scelta della DD.LL. Compresi giunti di dilatazione, coprifili angolari, parasigoli, ponteggio ed ogni altro onere inerente. | m²       | € 60,00                | 20%<br>(€ 12,00)    | 4.749,60<br>euro |

| DESIGNAZIONE DEI LAVORI                                                                                                                                                                                                                                                                                                                                                                                                                                                                                                                                                                                                                                                                                                                                                                                                                                                                                                                                                                                                                             | IMPORTI  |                        |                      |                   |
|-----------------------------------------------------------------------------------------------------------------------------------------------------------------------------------------------------------------------------------------------------------------------------------------------------------------------------------------------------------------------------------------------------------------------------------------------------------------------------------------------------------------------------------------------------------------------------------------------------------------------------------------------------------------------------------------------------------------------------------------------------------------------------------------------------------------------------------------------------------------------------------------------------------------------------------------------------------------------------------------------------------------------------------------------------|----------|------------------------|----------------------|-------------------|
|                                                                                                                                                                                                                                                                                                                                                                                                                                                                                                                                                                                                                                                                                                                                                                                                                                                                                                                                                                                                                                                     | unitario | % incidenza manodopera | TOTALE               |                   |
| <p>1.1.12 Fornitura e posa in opera di pareti interne eseguita a secco con:</p> <p>- montanti in lamiera zincata spessore cm 6 con forature predisposte per il passaggio di canalizzazioni ed impiantistica varia;</p> <p>- completamento degli interspazi tra i montanti dopo il posizionamento degli impianti eseguito a totale riempimento con pannello in fibra minerale mm 75;</p> <p>- posizionamento di 1° lastra in gesso-fibra rinforzata di spessore mm 12,5 unite una all'altra e avvitate ai montanti sottostanti;</p> <p>- posizionamento di 2° lastra sfalsata sovrapposta in cartongesso di mm 12,5 unite una all'altra e fissate con idonee viti;</p> <p>- garzatura e stuccatura delle giunzioni e delle viti di fissaggio;</p> <p>- foratura e riquadratura delle scatole di derivazione e portafrutti degli impianti, porte e finestre, travi passanti, ecc.</p> <p>Compreso ogni altro onere inerente per dare un lavoro finito a perfetta regola d'arte.</p>                                                                   | m²       | € 19,00                | 20%<br>(€ 3,80)      | 823,84<br>euro    |
| <p>21.5.10 Capriate con travi in abete o pino a spigoli vivi, di qualunque lunghezza e sezione, fornite e poste in opera, compresi il taglio, carbolineatura o catramatura sulle parti da murare, incluso il taglio di incastri e fori nelle murature e la successiva suggellatura degli stessi e la ferramenta necessaria (piastre, bulloni, ecc.) per dare l'opera completa a perfetta regola d'arte.</p>                                                                                                                                                                                                                                                                                                                                                                                                                                                                                                                                                                                                                                         | m³       | € 2041,15              | 30,75%<br>(€ 627,68) | 12.471,42<br>euro |
| <p>21.5.14 Tavole di abete di spessore 20-25 mm, fornite e poste in opera per impalcatura o per appoggio del manto di tegole, compresi la necessaria chiodatura ed ogni onere e magistero.</p> <p>- per ogni m² di superficie effettiva</p>                                                                                                                                                                                                                                                                                                                                                                                                                                                                                                                                                                                                                                                                                                                                                                                                         | m²       | € 23,80                | 34,69%<br>(€ 8,26)   | 1.332,80<br>euro  |
| <p>12.1.6 Fornitura e posa in opera di impermeabilizzazione con membrana membrana bituminosa a base di bitume distillato e copolimeri poliolefinici "metallocene" (POE) formulati in modo tale da conferire al compound una flessibilità al freddo di - 25 °.</p> <p>La membrana avrà una armatura composita a tre strati ( triarmata ) ed uno spessore minimo di 4 mm e rivestita con scaglie di ardesia e dovrà essere certificata dal produttore come membrana con destinazione d'uso ; monostrato a finire . Inoltre sarà dotata di apposita certificazione di resistenza al fuoco secondo le norme Broof ( T2 ) La membrana, dello spessore minimo di 4 mm, sarà messa in opera a qualsiasi altezza e per superfici orizzontali od inclinate, a caldo, con giunti sovrapposti per almeno 10 cm e previa spalmatura del sottofondo con emulsione bituminosa, compreso i risvolti di raccordo con le pareti per un'altezza minima di 20 cm, tiri in alto ed ogni altro onere e magistero per dare l'opera completa a perfetta regola d'arte.</p> | m²       | € 18,92                | 14,55%<br>(€ 2,75)   | 1.059,52<br>euro  |
| <p>11.2.1 Tinteggiatura per esterni in fibrocemento con silicati di potassio, di elevata permeabilità al vapore acqueo e resistenza agli agenti atmosferici, a superficie opaca. Data in opera su superfici orizzontali o verticali, rette o curve, applicata a pennello o a rullo in due mani, previa pulitura, spolveratura e successivo trattamento delle superfici con idoneo fondo isolante e quanto altro occorre per dare il lavoro compiuto a perfetta regola d'arte.</p>                                                                                                                                                                                                                                                                                                                                                                                                                                                                                                                                                                   | m²       | € 7,55                 | 31,27%<br>(€ 2,36)   | 597,66<br>euro    |

| DESIGNAZIONE DEI LAVORI |                                                                                                                                                                                                                                                                                                                                                                                                                                                                                                                                                                                                                                                                                                                                                                                                                                                                                                                                                                                                                                                                                                                                                                                                                                                                                                                                                                                                                                                                                                                                                                                                                                                                                                                                                                          | IMPORTI        |                        |                  |
|-------------------------|--------------------------------------------------------------------------------------------------------------------------------------------------------------------------------------------------------------------------------------------------------------------------------------------------------------------------------------------------------------------------------------------------------------------------------------------------------------------------------------------------------------------------------------------------------------------------------------------------------------------------------------------------------------------------------------------------------------------------------------------------------------------------------------------------------------------------------------------------------------------------------------------------------------------------------------------------------------------------------------------------------------------------------------------------------------------------------------------------------------------------------------------------------------------------------------------------------------------------------------------------------------------------------------------------------------------------------------------------------------------------------------------------------------------------------------------------------------------------------------------------------------------------------------------------------------------------------------------------------------------------------------------------------------------------------------------------------------------------------------------------------------------------|----------------|------------------------|------------------|
|                         |                                                                                                                                                                                                                                                                                                                                                                                                                                                                                                                                                                                                                                                                                                                                                                                                                                                                                                                                                                                                                                                                                                                                                                                                                                                                                                                                                                                                                                                                                                                                                                                                                                                                                                                                                                          | unitario       | % incidenza manodopera | TOTALE           |
| 12.1.10                 | Fornitura e posa in opera di strato impermeabilizzante per coperture, con zavorra mobile o rigida, da computarsi a parte, realizzato con manto sintetico in poliolefine flessibile (TPO) ottenuto per co-estrusione con inserimento di velo vetro da 50 g/m <sup>2</sup> come stabilizzatore dimensionale. Il manto sintetico deve essere dotato di elevata resistenza dello strato superiore ai raggi U.V. ed agli agenti atmosferici e dello strato inferiore, al punzonamento ed all'attacco delle radici, deve garantire adattabilità ai movimenti strutturali ed alla flessibilità alle basse temperature. In opera su superfici verticali e orizzontali con sormonti di almeno 7 cm saldati per termofusione, applicato a secco su supporto costituito da uno strato di scorrimento in geotessile non tessuto di tipologia e grammatura da definire ed appesantimento parziale ove richiesto dalla D.L. Sono compresi e compensati nel presente prezzo il tiro in alto, gli sfridi, la piattina in TPO di fissaggio, chiodi e/o viti per il fissaggio della stessa, i risvolti di raccordo con le pareti verticali per un'altezza minima di 20 cm attestati con idoneo profilo in TPO e sigillati con idoneo silicone, gli accessori (bocchettoni, raccordi angoli, etc.) ed ogni altro onere e magistero per dare l'opera compiuta a perfetta regola d'arte.                                                                                                                                                                                                                                                                                                                                                                                                      |                |                        |                  |
|                         | 1) spessore 1,5 mm                                                                                                                                                                                                                                                                                                                                                                                                                                                                                                                                                                                                                                                                                                                                                                                                                                                                                                                                                                                                                                                                                                                                                                                                                                                                                                                                                                                                                                                                                                                                                                                                                                                                                                                                                       | m <sup>2</sup> | 10,80%<br>(€ 2,40)     | 1.245,44<br>euro |
| 12.5.1                  | Copertura realizzata con lastre ondulate o grecate multistrato, marchiate CE secondo UNI EN 14782, conformi UNI EN 508. Le lastre saranno costituite da una lamiera di acciaio zincato strutturale (EN 10346) dello spessore variabile secondo quanto previsto in progetto da mm 0,50 ovvero mm 0,60 o 0,80; protetta nella faccia superiore da un rivestimento termoplastico (dello spessore di circa mm 1,5) anticorrosivo ed insonorizzante e da una lamina in alluminio naturale (ovvero di alluminio preverniciato, ovvero di rame elettrolitico), e nella faccia inferiore da un primer e da una lamina di alluminio naturale. I rivestimenti esterni avvolgeranno i bordi laterali delle lastre per tutta la lunghezza per garantirne la protezione. Per assicurare la stabilità nel tempo delle caratteristiche prestazionali, la protezione con funzione anticorrosiva e insonorizzante, dello spessore di circa mm 1,5, dovrà essere posizionata sull'estradosso della lamiera. L'elemento di copertura dovrà assicurare i seguenti requisiti prestazionali:<br>• Reazione al fuoco: Classe B-s1, d0 (UNI EN 13501-1; EN 13823; EN ISO 11925-2)<br>• Comportamento al fuoco esterno: Classe BRoof t3 (UNI EN 13501-5; UNI CEN/TS 1187)<br>• Durabilità - Resistenza alla corrosione in nebbia salina: 3000 ore (ISO 9227)<br>• Durabilità - Resistenza all'umidità: 3000 ore (EN ISO 6270-1)<br>• Durabilità - Resistenza all'anidride solforosa: 45 cicli (EN ISO 6988)<br>• Potere fonoisolante: 28 dB (UNI EN ISO 140-3)<br>• Potere di attenuazione sonora del rumore generato da pioggia battente:<br>Il prezzo è comprensivo di accessori per il fissaggio, colmi, scossaline e quanto altro occorre per dare l'opera finita e a perfetta regola d'arte. |                |                        |                  |
|                         | 1) con acciaio spessore 0,5 mm                                                                                                                                                                                                                                                                                                                                                                                                                                                                                                                                                                                                                                                                                                                                                                                                                                                                                                                                                                                                                                                                                                                                                                                                                                                                                                                                                                                                                                                                                                                                                                                                                                                                                                                                           | m <sup>2</sup> | 14,09%<br>(€ 7,55)     | 3.118,08<br>euro |
| 23.6.1                  | Tinteggiatura per interni con pittura a tempera a base di resine naturali a dispersione, certificata ecobiocompatibile, composta da acqua, pigmenti minerali, sostanze di riempimento, leganti vegetali. Data in opera su superfici orizzontali o verticali, rette o curve, applicata a pennello o a rullo in due mani, previa pulitura, spolveratura e successivo trattamento delle superfici con idoneo fondo isolante e quanto altro occorre per dare il lavoro compiuto a perfetta regola d'arte.                                                                                                                                                                                                                                                                                                                                                                                                                                                                                                                                                                                                                                                                                                                                                                                                                                                                                                                                                                                                                                                                                                                                                                                                                                                                    | m <sup>2</sup> | 30,98%<br>(€ 2,36)     | 1.264 euro       |
|                         | • Fibra di cellulosa sfusa FiberTherm floc.                                                                                                                                                                                                                                                                                                                                                                                                                                                                                                                                                                                                                                                                                                                                                                                                                                                                                                                                                                                                                                                                                                                                                                                                                                                                                                                                                                                                                                                                                                                                                                                                                                                                                                                              | kg             | 30 %<br>(€ 0,27)       | 1.357,20<br>euro |

| DESIGNAZIONE DEI LAVORI |                                                                                                                                                                                                                                                                                                                                                                                                                                                                                                                                                                                                                                                                                                                                                                                                                                                                                                                                                                                                                                                                                                                                                                                                                                                                                                                                                                                                                                                                                                                                                                                                                                                                                                                                                                                                                                                                                                                                                                                                                                                                                                                                                                                       | IMPORTI  |                        |                     |                  |
|-------------------------|---------------------------------------------------------------------------------------------------------------------------------------------------------------------------------------------------------------------------------------------------------------------------------------------------------------------------------------------------------------------------------------------------------------------------------------------------------------------------------------------------------------------------------------------------------------------------------------------------------------------------------------------------------------------------------------------------------------------------------------------------------------------------------------------------------------------------------------------------------------------------------------------------------------------------------------------------------------------------------------------------------------------------------------------------------------------------------------------------------------------------------------------------------------------------------------------------------------------------------------------------------------------------------------------------------------------------------------------------------------------------------------------------------------------------------------------------------------------------------------------------------------------------------------------------------------------------------------------------------------------------------------------------------------------------------------------------------------------------------------------------------------------------------------------------------------------------------------------------------------------------------------------------------------------------------------------------------------------------------------------------------------------------------------------------------------------------------------------------------------------------------------------------------------------------------------|----------|------------------------|---------------------|------------------|
|                         |                                                                                                                                                                                                                                                                                                                                                                                                                                                                                                                                                                                                                                                                                                                                                                                                                                                                                                                                                                                                                                                                                                                                                                                                                                                                                                                                                                                                                                                                                                                                                                                                                                                                                                                                                                                                                                                                                                                                                                                                                                                                                                                                                                                       | unitario | % incidenza manodopera | TOTALE              |                  |
| 8.3.1                   | <p>Fornitura e posa in opera di serramenti in legno douglas per finestre e porte-finestre, a vetri, ad una o più ante o a vasistas, costituiti da telaio maestro fisso murato a cemento con sei robuste grappe di ferro su muratura di qualsiasi tipo e di qualsiasi spessore o con contro telaio in abete, e telaio mobile, ancorato al telaio fisso con cerniere del tipo pesante in numero di due per ciascuna anta mobile di finestra ed in numero di tre per ciascuna anta mobile di porta-finestra. Il serramento dovrà garantire le seguenti prestazioni: classe di permeabilità all'aria 4 (UNI EN 12207); classe di tenuta all'acqua 9A (UNI EN 12208); classe di resistenza al vento 5 (UNI EN 12210); trasmittanza termica complessiva U, calcolata secondo il procedimento previsto dalla norma UNI EN 10077-1 non superiore ai valori limite imposti per zona climatica secondo quanto indicato nei D.Lgs. 192/05 e s.m.i; marcatura CE secondo UNI EN 14351-1. Inoltre dovrà garantire un isolamento acustico secondo quanto indicato dal D.P.C.M. pubblicato in G.U. del 22/12/97. Sono compresi e compensati nel prezzo:lo scacciacqua applicato ad incastro a coda di rondine e munito di gocciolatoio, la battentatura (a profilo curvo e a squadra) doppia per i lati verticali e semplice per i lati orizzontali, la battentatura o la guida a canaletto nei riquadri interni per il fissaggio del vetro, i listelli copri filo opportunamente sagomati, cremonesi per chiusura con nasello a richiamo e maniglia in ottone pesante con bacchette incorporate nel legno per le parti a vasistas, asta di manovra con maniglia e compassi in ottone ed eventuale guarnizione in gomma resistente all'invecchiamento ed ai raggi UV per la tenuta termoacustica, nonché la verniciatura con due mani di vernice trasparente, previa mano di antitarnico ed ogni altro onere ed accessorio per dare l'opera completa a perfetta regola d'arte, inclusi i vetri.</p> <p>- Superficie minima di misurazione: 0,9 m².</p> <p>2) con trasmittanza termica complessiva non superiore a 1,5 W/(m²/K) – Sezione 70 mm. con vetro camera 4-6-4 alta efficienza con argon</p> | m²       | € 493,15               | 6,36%<br>(€ 31,38)  | 5.345,74<br>euro |
| 15.1.2                  | <p>Fornitura e collocazione di lavello da cucina in fire-clay delle dimensioni di 90x45 cm circa con tavola scolapiatti incorporata, completo di pilettona a griglia in ottone cromato da 1" ¼ con tappo e catenella, i flessibili, sifone a bottiglia, gruppo miscelatore in ottone cromato, le mensole in acciaio smaltato o le spallette in mattoni pieni intonacate, le opere murarie (realizzazione basamento), i collegamenti ai punti di adduzione d'acqua (calda e fredda) e di scarico e ventilazione, già predisposti, e quanto altro occorrente per dare l'opera completa e funzionante a perfetta regola d'arte.</p>                                                                                                                                                                                                                                                                                                                                                                                                                                                                                                                                                                                                                                                                                                                                                                                                                                                                                                                                                                                                                                                                                                                                                                                                                                                                                                                                                                                                                                                                                                                                                      | cad      | € 336,82               | 20,43%<br>(€ 68,80) | 336,82 euro      |
| 15.1.4                  | <p>Fornitura e collocazione di piatto per doccia in grès porcellanato, con gruppo miscelatore, doccia con braccio tipo saliscendi e diffusore snodabile, piletta a sifone con griglia in ottone compreso rosoni, opere murarie, i collegamenti ai punti di adduzione d'acqua (calda e fredda) e di scarico e ventilazione, già predisposti, e quanto altro occorrente per dare l'opera completa e funzionante a perfetta regola d'arte.</p> <p>2) delle dimensioni di 80x80 cm</p>                                                                                                                                                                                                                                                                                                                                                                                                                                                                                                                                                                                                                                                                                                                                                                                                                                                                                                                                                                                                                                                                                                                                                                                                                                                                                                                                                                                                                                                                                                                                                                                                                                                                                                    | cad      | € 266,18               | 31,02%<br>(€ 82,56) | 266,18 euro      |
| 15.1.6                  | <p>Fornitura e collocazione di bidet in porcellana vetrificata a pianta ovale delle dimensioni di 58x35 cm, con miscelatore in ottone cromato, sifone ad S e piletta di scarico con tappo a pistone in ottone cromato, i rosoni, i flessibili, l'attacco al pavimento con viti e bulloni cromati, opere murarie, i collegamenti ai punti di adduzione d'acqua (calda e fredda) e di scarico e ventilazione, già predisposti, e quanto altro occorrente per dare l'opera completa e funzionante a perfetta regola d'arte.</p>                                                                                                                                                                                                                                                                                                                                                                                                                                                                                                                                                                                                                                                                                                                                                                                                                                                                                                                                                                                                                                                                                                                                                                                                                                                                                                                                                                                                                                                                                                                                                                                                                                                          | cad      | € 243,12               | 24,26%<br>(€ 58,97) | 243,12 euro      |

| DESIGNAZIONE DEI LAVORI |                                                                                                                                                                                                                                                                                                                                                                                                                                                                                                                                                                                                                                                                                                                                                                                                                                                            | IMPORTI         |                             |                            |
|-------------------------|------------------------------------------------------------------------------------------------------------------------------------------------------------------------------------------------------------------------------------------------------------------------------------------------------------------------------------------------------------------------------------------------------------------------------------------------------------------------------------------------------------------------------------------------------------------------------------------------------------------------------------------------------------------------------------------------------------------------------------------------------------------------------------------------------------------------------------------------------------|-----------------|-----------------------------|----------------------------|
|                         |                                                                                                                                                                                                                                                                                                                                                                                                                                                                                                                                                                                                                                                                                                                                                                                                                                                            | unitario        | % incidenza manodopera      | TOTALE                     |
| 15.1.8                  | Fornitura e collocazione di vaso igienico in porcellana vetrificata a pianta ovale delle dimensioni di 55x35 cm circa del tipo a cacciata con sifone incorporato, completo di sedile in bachelite con coperchio, compresa la fornitura e collocazione di cassetta esterna di scarico in PVC a zaino con comando a doppio pulsante da 5 e 10 l compreso il pezzo da incasso, i rosoni, l'attacco al pavimento con viti e bulloni cromati, le opere murarie, il collegamento al punto di adduzione d'acqua (fredda) e di scarico e ventilazione, già predisposti, e quanto altro occorrente per dare l'opera completa e funzionante a perfetta d'arte.                                                                                                                                                                                                       |                 |                             |                            |
|                         | <b>cad</b>                                                                                                                                                                                                                                                                                                                                                                                                                                                                                                                                                                                                                                                                                                                                                                                                                                                 | <b>€ 245,43</b> | <b>28,03%<br/>(€ 68,80)</b> | <b>245,43 euro</b>         |
| 15.1.3                  | Fornitura e collocazione di lavatoio in grès porcellanato, con scanalature per incastro della tavola, delle dimensioni di 60x50 cm, poggiato su muratura di mattoni, completo di piletta di scarico con tappo e catenella, sifone a scatola ispezionabile, gruppo miscelatore in ottone cromato, opere murarie (realizzazione basamento), i collegamenti ai punti di adduzione d'acqua (calda e fredda) e di scarico e ventilazione, già predisposti, e quanto altro occorrente per dare l'opera completa e funzionante a perfetta regola d'arte.                                                                                                                                                                                                                                                                                                          |                 |                             |                            |
|                         | <b>cad</b>                                                                                                                                                                                                                                                                                                                                                                                                                                                                                                                                                                                                                                                                                                                                                                                                                                                 | <b>€ 278,46</b> | <b>24,71%<br/>(€ 68,80)</b> | <b>278,46 euro</b>         |
| 26.1.8                  | Nolo di ponteggio con sistema a montante e traverso prefabbricato (sistema modulare multidirezionale), costituito in opera compreso i pianali in legno o metallo, le tavole ferma piede, i parapetti, le scale interne di collegamento tra pianale e pianale, gli ancoraggi affinché il ponteggio sia efficacemente assicurato al manufatto almeno in corrispondenza ad ogni due piani dello stesso e ad ogni due montanti, con disposizione di ancoraggio a rombo, compreso la segnaletica, il controllo degli ancoraggi, la manutenzione ed ogni altro onere e magistero per dare la struttura installata nel rispetto della normativa di sicurezza vigente, escluso l'illuminazione.<br>- per ogni m² di ponteggio in opera misurato dalla base e per ciascuno dei successivi mesi o frazione di mese non inferiore a 25 giorni, dopo i primi 30 giorni | <b>m²</b>       | <b>€ 1,86</b>               | <b>27,06%<br/>(€ 0,50)</b> |
| 26.1.9                  | Smontaggio ad opera ultimata di ponteggio di cui alla voce 26.1.8, compreso il carico in cantiere, il trasporto e lo scarico al deposito.                                                                                                                                                                                                                                                                                                                                                                                                                                                                                                                                                                                                                                                                                                                  |                 |                             |                            |
|                         | - per ogni m² di ponteggio in opera misurato dalla base                                                                                                                                                                                                                                                                                                                                                                                                                                                                                                                                                                                                                                                                                                                                                                                                    | <b>m²</b>       | <b>€ 3,39</b>               | <b>77,03%<br/>(€ 2,61)</b> |
| 26.1.10                 | Ponteggio mobile per altezze non superiori a 7,00 m, realizzato con elementi tubolari metallici e provvisto di ruote, di tavole ferma piedi, di parapetti, di scale interne di collegamento tra pianale e pianale, compreso il primo piazzamento, la manutenzione ed ogni altro onere e magistero per dare la struttura installata nel rispetto della normativa di sicurezza vigente. il ponteggio mobile sarà utilizzato solo all'interno, per opere di ristrutturazione, restauro ecc., nel caso in cui la superficie di scorrimento risulta piana e liscia tale da consentire agevolmente lo spostamento.                                                                                                                                                                                                                                               |                 |                             |                            |
|                         | - per ogni m³ e per tutta la durata dei lavori                                                                                                                                                                                                                                                                                                                                                                                                                                                                                                                                                                                                                                                                                                                                                                                                             | <b>m³</b>       | <b>€ 15,70</b>              | <b>35,17%<br/>(€ 5,52)</b> |
|                         | • Impianto idrico.                                                                                                                                                                                                                                                                                                                                                                                                                                                                                                                                                                                                                                                                                                                                                                                                                                         | <b>m²</b>       | <b>€ 20,00</b>              | <b>1.000 euro</b>          |
|                         | • Impianto elettrico domotico.                                                                                                                                                                                                                                                                                                                                                                                                                                                                                                                                                                                                                                                                                                                                                                                                                             | <b>m²</b>       | <b>€ 50,00</b>              | <b>2.500 euro</b>          |
|                         | • Stufe a legna.                                                                                                                                                                                                                                                                                                                                                                                                                                                                                                                                                                                                                                                                                                                                                                                                                                           | <b>cad.</b>     |                             | <b>5.000 euro</b>          |



| DESIGNAZIONE DEI LAVORI |                                                                                                                                                                                                                                                                                                                                                                                                                                                                                                                                                                                                                                                                                                                                                                                                                                                                                                                                                                                                                                                                                                                                                                                                                                                                                                                                                                                                                                                                                                                                                  | IMPORTI  |                        |                      |                  |
|-------------------------|--------------------------------------------------------------------------------------------------------------------------------------------------------------------------------------------------------------------------------------------------------------------------------------------------------------------------------------------------------------------------------------------------------------------------------------------------------------------------------------------------------------------------------------------------------------------------------------------------------------------------------------------------------------------------------------------------------------------------------------------------------------------------------------------------------------------------------------------------------------------------------------------------------------------------------------------------------------------------------------------------------------------------------------------------------------------------------------------------------------------------------------------------------------------------------------------------------------------------------------------------------------------------------------------------------------------------------------------------------------------------------------------------------------------------------------------------------------------------------------------------------------------------------------------------|----------|------------------------|----------------------|------------------|
|                         |                                                                                                                                                                                                                                                                                                                                                                                                                                                                                                                                                                                                                                                                                                                                                                                                                                                                                                                                                                                                                                                                                                                                                                                                                                                                                                                                                                                                                                                                                                                                                  | unitario | % incidenza manodopera | TOTALE               |                  |
| 24.1.1                  | <p>Fornitura e collocazione di collettore solare per produzione di acqua calda avente le seguenti caratteristiche: superficie lorda da 2,5 m²; superficie di apertura 2,2 m²; superficie effettiva assorbitore da 2,15 m²; assorbitore in rame strutturato per il massimo rendimento con finitura selettiva; assorbimento energetico non inferiore al 95%; emissione non superiore al 5%; tubazioni in rame saldate ad ultrasuoni sulla piastra per il trasferimento del liquido termovettore acqua-glicole collegate a 2 collettori in rame; attacchi idraulici da 1"; isolamento in lana di roccia di spessore non inferiore a 50 mm; isolamento laterale; vasca di contenimento in alluminio stampata in un unico pezzo per garantire affidabilità e tenuta; vetro temperato di sicurezza antiriflesso e antigrandine da almeno 3,2 mm; guarnizione in epdm in unico pezzo; pozzetto in rame per sonda di temperatura; temperatura massima non inferiore a 230 °C; pressione massima di esercizio non inferiore a 10 bar; conforme alle norma EN12975. Compreso il tiro in alto, i mezzi di sollevamento, l'installazione su appositi supporti incluso materiale di fissaggio ed opere murarie, collegamento idraulico, collegamenti elettrici, la prova di tenuta, la pulizia e quanto altro occorra per dare l'opera completa e funzionante a perfetta regola d'arte.</p> <p>2) sistema composto da n. 2 collettori solari installato su copertura piana o inclinata compresa l'installazione del kit relativo su struttura predisposta</p> | cad      | € 1490,64              | 19,01%<br>(€ 283,31) | 1.490,64<br>euro |
| 24.4.2                  | <p>Fornitura e posa in opera di modulo fotovoltaico in silicio monocristallino, struttura in alluminio anodizzato resistente alla torsione, telaio in vetro con carichi resistenti fino a 5,4 kN/m². Scatola di connessione piatta IP 65, con 3 diodi di by-pass, completa di cavo e connettori multicontact mc Type con segno + e -. Numero di celle per modulo: 72. Dimensioni della cella: 125x125 mm². tensione massima di sistema SKII: 1000 Vdc. tensione a vuoto (Voc): da 43,8 V a 44,8 V. tensione a massima potenza (Vmpp): da 35 V a 36,3 V. Corrente di cortocircuito (Isc): da 5 A a 5,5 A. Corrente a massima potenza (Impp): da 4,58 A a 5,10 A. Caratteristiche termiche: NOCT: 46 °C, TKIsc: 0,036%/K, TK Voc: 0,33%/K. Connettore mc Type4. Classe di protezione: II. tolleranza sulla potenza di picco (solo positiva): 0/+3%. Certificazione: IEC 61215. Resa della cella fotovoltaica: ≥14,9%. Decadimento sulla potenza di picco: ≤ 20% in 25 anni. Garanzia sul prodotto 10 anni o superiore.</p> <p>11) 300 Wp</p>                                                                                                                                                                                                                                                                                                                                                                                                                                                                                                       | cad      | € 374,36               | 12,07%<br>(€ 45,20)  | 748,72 euro      |
| 15.2.2                  | <p>Fornitura e posa in opera di serbatoi prefabbricati in P.R.F.V. a fondo bombato,realizzati con resine idonee al contenimento di acqua potabile secondo le norme del D.M. Salute n. 174 del 6/04/2004 e s.mm.ii., da collocare esternamente o se interrati da inglobare in manufatti di conglomerato cementizio da compensare a parte, completi di botola a tenuta stagna a passo d'uomo per consentire l'ispezione e manutenzione e di bocchettoni per il prelievo ed immissione di liquidi. Il serbatoio sarà completo di valvole di arresto di idoneo diametro da collocarsi una all'ingresso sulla tubazione di alimentazione e una all'uscita sulla tubazione di distribuzione, di tubo per troppopieno e piedi di appoggio. All'interno del serbatoio verrà collocato idoneo galleggiante per l'arresto dell'afflusso dei liquidi. Il prezzo è altresì comprensivo di ogni altro onere e magistero occorrente per la esecuzione a perfetta regola d'arte, escluso eventuale basamento.</p> <p>1) per capienza 1.000 l</p>                                                                                                                                                                                                                                                                                                                                                                                                                                                                                                                | cad      | € 1644,11              | 7,31%<br>(€ 120,13)  | 1.644,11<br>euro |
| TOTALE: 71.080,59 €     |                                                                                                                                                                                                                                                                                                                                                                                                                                                                                                                                                                                                                                                                                                                                                                                                                                                                                                                                                                                                                                                                                                                                                                                                                                                                                                                                                                                                                                                                                                                                                  |          |                        |                      |                  |



# MBP

| DESIGNAZIONE DEI LAVORI per <b>Mura in Balle di Paglia (MBP)</b> |                                                                                                                                                                                                                                                                                                                                                                                                                                                                                                                                                                                                                                                                                                                                                                                                                                                                                                                                                                                                                                                                                                                                                                                                                                                                                                                                                                                                                                                                                                                                                                                                                                                                                                                                                                                                                                                                                                                                           | IMPORTI  |                        |                    |                  |
|------------------------------------------------------------------|-------------------------------------------------------------------------------------------------------------------------------------------------------------------------------------------------------------------------------------------------------------------------------------------------------------------------------------------------------------------------------------------------------------------------------------------------------------------------------------------------------------------------------------------------------------------------------------------------------------------------------------------------------------------------------------------------------------------------------------------------------------------------------------------------------------------------------------------------------------------------------------------------------------------------------------------------------------------------------------------------------------------------------------------------------------------------------------------------------------------------------------------------------------------------------------------------------------------------------------------------------------------------------------------------------------------------------------------------------------------------------------------------------------------------------------------------------------------------------------------------------------------------------------------------------------------------------------------------------------------------------------------------------------------------------------------------------------------------------------------------------------------------------------------------------------------------------------------------------------------------------------------------------------------------------------------|----------|------------------------|--------------------|------------------|
|                                                                  |                                                                                                                                                                                                                                                                                                                                                                                                                                                                                                                                                                                                                                                                                                                                                                                                                                                                                                                                                                                                                                                                                                                                                                                                                                                                                                                                                                                                                                                                                                                                                                                                                                                                                                                                                                                                                                                                                                                                           | unitario | % incidenza manodopera | TOTALE             |                  |
| 1.1.5                                                            | <p>Scavo a sezione obbligata, per qualsiasi finalit , per lavori da eseguirsi in ambito extraurbano, eseguito con mezzo meccanico fino alla profondit  di 2,00 m dal piano di sbancamento o, in mancanza di questo dall'orlo medio del cavo, eseguito a sezione uniforme, a gradoni, anche in presenza di acqua con tirante non superiore a 20 cm, alberi e ceppaie di dimensioni inferiori a quelle delle voci 1.6.1 e 1.6.2, escluse le armature di qualsiasi tipo anche a cassa chiusa, occorrenti per le pareti, compresi il paleggio, il sollevamento, il carico, il trasporto delle materie nell'ambito del cantiere fino alla distanza di 1000 m o l'accatastamento delle materie riutilizzabili lungo il bordo del cavo, gli aggettamenti, la regolarizzazione delle pareti e del fondo eseguita con qualsiasi mezzo, compreso l'onere per il prelievo dei campioni (da effettuarsi in contraddittorio tra la D.L. e l'Impresa), il confezionamento dei cubetti questo da compensarsi a parte con il relativo prezzo (capitolo 20), da sottoporre alle prove di schiacciamento ed ogni altro onere per dare l'opera completa a perfetta regola d'arte. Sono esclusi gli accertamenti e le verifiche tecniche obbligatorie previsti dal C.S.A.</p> <p>2) in rocce lapidee integre con resistenza allo schiacciamento da oltre 4 N/mm  e fino a 10 N/mm  ed in rocce lapidee fessurate di qualsiasi resistenza con superfici di discontinuit  poste a distanza media l'una dall'altra superiore a 30 cm e fino a 50 cm, attaccabili da idoneo mezzo di escavazione di adeguata potenza non inferiore ai 45 kW. La resistenza allo schiacciamento per le rocce lapidee integre sar  determinata su provini da prelevare in numero non inferiore a 5 provini (da 10x10x10 cm) fino ai primi 300 m  di materiale e sar  rideterminato con le stesse modalit  ogni qualvolta sar  riscontrata variazione delle classi di resistenza</p> | m        |   12,70                | 12,86%<br>(  1,63) | 444,50<br>euro   |
| 3.1.1                                                            | <p>Conglomerato cementizio per strutture non armate o debolmente armate, compreso la preparazione dei cubetti, il conferimento in laboratorio per le prove dei materiali, la vibratura dei getti, la lisciatura delle facce apparenti con malta di cemento puro ed ogni altro onere occorrente per dare il conglomerato in sito ed il lavoro eseguito a perfetta regola d'arte, esclusa l'eventuale aggiunta di altri additivi, da computarsi ove necessari ed escluse le casseforme e le barre di armatura.</p> <p>8) per opere in elevazione lavori edili con C 20/25</p>                                                                                                                                                                                                                                                                                                                                                                                                                                                                                                                                                                                                                                                                                                                                                                                                                                                                                                                                                                                                                                                                                                                                                                                                                                                                                                                                                               | m        |   153,36               | 4,90%<br>(  7,51)  | 5.367,60<br>euro |
| 3.2.3                                                            | <p>Casseforme per getti di conglomerati semplici o armati, di qualsiasi forma e dimensione, escluse le strutture intelaiate in cemento armato e le strutture speciali, realizzate con legname o con pannelli di lamiera monolitica d'acciaio rinforzati, di idoneo spessore, compresi piantane (o travi), morsetti a ganascia, morsetti tendifilo e tenditori, cunei bloccaggio, compreso altres  ogni altro onere e magistero per controventatura, disarmo, pulitura e accatastamento del materiale, il tutto eseguito a perfetta regola d'arte, misurate per la superficie dei casseri a contatto dei conglomerati.</p>                                                                                                                                                                                                                                                                                                                                                                                                                                                                                                                                                                                                                                                                                                                                                                                                                                                                                                                                                                                                                                                                                                                                                                                                                                                                                                                 | m        |   23,91                | 24,70%<br>(  5,91) | 358,65<br>euro   |
| 3.2.4                                                            | <p>Fornitura e collocazione di rete d'acciaio elettrosaldata a fili nervati ad adherenza migliorata Classi B450 C o B450 A controllato in stabilimento, con diametro non superiore a 8 mm, di caratteristiche conformi alle norme tecniche vigenti, comprese le saldature ed il posizionamento in opera, gli eventuali tagli a misura, legature di filo di ferro, i distanziatori, gli sfridi, eventuali sovrapposizioni anche se non prescritte nei disegni esecutivi, compreso l'onere per la formazione dei provini ed il conferimento in laboratorio per le prove dei materiali previste dalle norme vigenti in materia.</p>                                                                                                                                                                                                                                                                                                                                                                                                                                                                                                                                                                                                                                                                                                                                                                                                                                                                                                                                                                                                                                                                                                                                                                                                                                                                                                          | kg       |   2,50                 | 20,14%<br>(  0,50) | 2.040 euro       |

| DESIGNAZIONE DEI LAVORI |                                                                                                                                                                                                                                                                                                                                                                                                                                                                                                                                                                                                                                                                                                                                                                                                                                                                                                                                                                                                                        | IMPORTI      |                        |                   |
|-------------------------|------------------------------------------------------------------------------------------------------------------------------------------------------------------------------------------------------------------------------------------------------------------------------------------------------------------------------------------------------------------------------------------------------------------------------------------------------------------------------------------------------------------------------------------------------------------------------------------------------------------------------------------------------------------------------------------------------------------------------------------------------------------------------------------------------------------------------------------------------------------------------------------------------------------------------------------------------------------------------------------------------------------------|--------------|------------------------|-------------------|
|                         |                                                                                                                                                                                                                                                                                                                                                                                                                                                                                                                                                                                                                                                                                                                                                                                                                                                                                                                                                                                                                        | unitario     | % incidenza manodopera | TOTALE            |
| 5.1.9                   | Fornitura, trasporto e posa in opera di pavimentazione per interni con elementi in monostrato omogeneo, di colore a scelta della D.L., dello spessore non inferiore a 20 mm realizzati con impasto costituito da materiale lavico di granulometria da 0,1 a 4 mm e cemento ad alta resistenza (C 40/50) e pressati (30 kN per elemento) oppure in micromarmo bianco o colorato e con superfici in vista da levigare e lucidare dopo la posa e da compensarsi a parte. I pavimenti devono essere posti in opera con collanti o malta cementizia su idoneo massetto da compensarsi a parte, compresa la boiacatura di cemento, tagli, sfridi ed ogni altro onere e magistero per dare l'opera completa a perfetta regola d'arte.                                                                                                                                                                                                                                                                                         |              |                        |                   |
|                         | 1) per elementi di formato 40x40 cm                                                                                                                                                                                                                                                                                                                                                                                                                                                                                                                                                                                                                                                                                                                                                                                                                                                                                                                                                                                    | m² € 67,94   | 20,25%<br>(€ 13,76)    | 3.804,64<br>euro  |
| 21.5.2                  | Travi e pilastri in legno di abete o pino di prima scelta, a spigoli vivi, di qualsiasi lunghezza e sezione, fornite e poste in opera per ossatura di solai, compresi il taglio, la carbolineatura o catramatura sulle parti da murare, incluso il taglio di incastri e fori nelle murature e la successiva suggellatura degli stessi.                                                                                                                                                                                                                                                                                                                                                                                                                                                                                                                                                                                                                                                                                 | m³ € 1012,86 | 29,65%<br>(€ 300,32)   | 6.553,20<br>euro  |
| 21.5.10                 | Capriate con travi in abete o pino a spigoli vivi, di qualunque lunghezza e sezione, fornite e poste in opera, compresi il taglio, carbolineatura o catramatura sulle parti da murare, incluso il taglio di incastri e fori nelle murature e la successiva suggellatura degli stessi e la ferramenta necessaria (piastre, bulloni, ecc.) per dare l'opera completa a perfetta regola d'arte.                                                                                                                                                                                                                                                                                                                                                                                                                                                                                                                                                                                                                           | m³ € 2041,15 | 30,75%<br>(€ 627,68)   | 12.471,42<br>euro |
| *                       | Balle di paglia, dimensioni 85x45x90 cm                                                                                                                                                                                                                                                                                                                                                                                                                                                                                                                                                                                                                                                                                                                                                                                                                                                                                                                                                                                | m² € 10,92   | 40 %<br>(€ 3,12)       | 1.099,20<br>euro  |
| 12.1.6                  | Fornitura e posa in opera di impermeabilizzazione con membrana bituminosa a base di bitume distillato e copolimeri poliolefinici "metallocene" (POE) formulati in modo tale da conferire al compound una flessibilità al freddo di - 25 ° . La membrana avrà una armatura composita a tre strati ( triarmata ) ed uno spessore minimo di 4 mm e rivestita con scaglie di ardesia e dovrà essere certificata dal produttore come membrana con destinazione d'uso ; monostrato a finire . Inoltre sarà dotata di apposita certificazione di resistenza al fuoco secondo le norme Broof ( T2 ) La membrana, dello spessore minimo di 4 mm, sarà messa in opera a qualsiasi altezza e per superfici orizzontali od inclinate, a caldo, con giunti sovrapposti per almeno 10 cm e previa spalmatura del sottofondo con emulsione bituminosa, compreso i risvolti di raccordo con le pareti per un'altezza minima di 20 cm, tiri in alto ed ogni altro onere e magistero per dare l'opera completa a perfetta regola d'arte. | m² € 18,92   | 14,55%<br>(€ 2,75)     | 1.059,52<br>euro  |

| DESIGNAZIONE DEI LAVORI |                                                                                                                                                                                                                                                                                                                                                                                                                                                                                                                                                                                                                                                                                                                                                                                                                                                                                                                                                                                                                                                                                                                                                                                                                                                                                                                                                                                                                                                                                                                                                                                                                                                                                                                                                                                                                                                                                                              | IMPORTI  |                        |                    |                  |
|-------------------------|--------------------------------------------------------------------------------------------------------------------------------------------------------------------------------------------------------------------------------------------------------------------------------------------------------------------------------------------------------------------------------------------------------------------------------------------------------------------------------------------------------------------------------------------------------------------------------------------------------------------------------------------------------------------------------------------------------------------------------------------------------------------------------------------------------------------------------------------------------------------------------------------------------------------------------------------------------------------------------------------------------------------------------------------------------------------------------------------------------------------------------------------------------------------------------------------------------------------------------------------------------------------------------------------------------------------------------------------------------------------------------------------------------------------------------------------------------------------------------------------------------------------------------------------------------------------------------------------------------------------------------------------------------------------------------------------------------------------------------------------------------------------------------------------------------------------------------------------------------------------------------------------------------------|----------|------------------------|--------------------|------------------|
|                         |                                                                                                                                                                                                                                                                                                                                                                                                                                                                                                                                                                                                                                                                                                                                                                                                                                                                                                                                                                                                                                                                                                                                                                                                                                                                                                                                                                                                                                                                                                                                                                                                                                                                                                                                                                                                                                                                                                              | unitario | % incidenza manodopera | TOTALE             |                  |
| 12.5.1                  | <p>Copertura realizzata con lastre ondulate o grecate multistrato, marchiate CE secondo UNI EN 14782 , conformi UNI EN 508. Le lastre saranno costituite da una lamiera di acciaio zincato strutturale (EN 10346) dello spessore variabile secondo quanto previsto in progetto da mm 0,50 ovvero mm 0,60 o 0,80, protetta nella faccia superiore da un rivestimento termoplastico (dello spessore di circa mm 1,5) anticorrosivo ed insonorizzante e da una lamina in alluminio naturale (ovvero di alluminio preverniciato, ovvero di rame elettrolitico), e nella faccia inferiore da un primer e da una lamina di alluminio naturale. I rivestimenti esterni avvolgeranno i bordi laterali delle lastre per tutta la lunghezza per garantirne la protezione. Per assicurare la stabilità nel tempo delle caratteristiche prestazionali, la protezione con finzione anticorrosiva e insonorizzante, dello spessore di circa mm 1,5, dovrà essere posizionata sull'estradosso della lamiera.</p> <p>L'elemento di copertura dovrà assicurare i seguenti requisiti prestazionali:</p> <ul style="list-style-type: none"><li>• Reazione al fuoco: Classe B-s1, d0 (UNI EN 13501-1; EN 13823; EN ISO 11925-2)</li><li>• Comportamento al fuoco esterno: Classe BRoof t3 (UNI EN 13501-5; UNI CEN/TS 1187)</li><li>• Durabilità - Resistenza alla corrosione in nebbia salina: 3000 ore (ISO 9227)</li><li>• Durabilità - Resistenza all'umidità: 3000 ore (EN ISO 6270-1)</li><li>• Durabilità - Resistenza all'anidride solforosa: 45 cicli (EN ISO 6988)</li><li>• Potere fonoisolante: 28 dB (UNI EN ISO 140-3)</li><li>• Potere di attenuazione sonora del rumore generato da pioggia battente:</li></ul> <p>Il prezzo è comprensivo di accessori per il fissaggio, colmi, scossaline e quanto altro occorre per dare l'opera finita e a perfetta regola d'arte.</p> <p>1) con acciaio spessore 0,5 mm</p> | m²       | € 55,68                | 14,09%<br>(€ 7,85) | 3.118,08<br>euro |
| 21.5.14                 | <p>Tavole di abete di spessore 20-25 mm, fornite e poste in opera per impalcatura o per appoggio del manto di tegole, compresi la necessaria chiodatura ed ogni onere e magistero.</p> <p>- per ogni m² di superficie effettiva</p>                                                                                                                                                                                                                                                                                                                                                                                                                                                                                                                                                                                                                                                                                                                                                                                                                                                                                                                                                                                                                                                                                                                                                                                                                                                                                                                                                                                                                                                                                                                                                                                                                                                                          | m²       | € 23,80                | 34,69%<br>(€ 8,26) | 1.332,80<br>euro |
| *                       | Impianto idrico.                                                                                                                                                                                                                                                                                                                                                                                                                                                                                                                                                                                                                                                                                                                                                                                                                                                                                                                                                                                                                                                                                                                                                                                                                                                                                                                                                                                                                                                                                                                                                                                                                                                                                                                                                                                                                                                                                             | m²       | € 20,00                |                    | 1.000 euro       |
| *                       | Impianto elettrico domotico.                                                                                                                                                                                                                                                                                                                                                                                                                                                                                                                                                                                                                                                                                                                                                                                                                                                                                                                                                                                                                                                                                                                                                                                                                                                                                                                                                                                                                                                                                                                                                                                                                                                                                                                                                                                                                                                                                 | m²       | € 50,00                |                    | 2.500 euro       |
| *                       | Stube a legna.                                                                                                                                                                                                                                                                                                                                                                                                                                                                                                                                                                                                                                                                                                                                                                                                                                                                                                                                                                                                                                                                                                                                                                                                                                                                                                                                                                                                                                                                                                                                                                                                                                                                                                                                                                                                                                                                                               | cad.     |                        |                    | 5.000 euro       |
| *                       | Fibra di cellulosa sfusa FiberTherm floc.                                                                                                                                                                                                                                                                                                                                                                                                                                                                                                                                                                                                                                                                                                                                                                                                                                                                                                                                                                                                                                                                                                                                                                                                                                                                                                                                                                                                                                                                                                                                                                                                                                                                                                                                                                                                                                                                    | kg       | € 1,17                 | 30 %<br>(€ 0,27)   | 1.357,20<br>euro |

| DESIGNAZIONE DEI LAVORI |                                                                                                                                                                                                                                                                                                                                                                                                                                                                                                                                                                                                                                                                                                                                                                                                                                                                                                                                                                                                                                                                                                                                                                                                                                                                                                                                                                     | IMPORTI        |                        |                     |                  |
|-------------------------|---------------------------------------------------------------------------------------------------------------------------------------------------------------------------------------------------------------------------------------------------------------------------------------------------------------------------------------------------------------------------------------------------------------------------------------------------------------------------------------------------------------------------------------------------------------------------------------------------------------------------------------------------------------------------------------------------------------------------------------------------------------------------------------------------------------------------------------------------------------------------------------------------------------------------------------------------------------------------------------------------------------------------------------------------------------------------------------------------------------------------------------------------------------------------------------------------------------------------------------------------------------------------------------------------------------------------------------------------------------------|----------------|------------------------|---------------------|------------------|
|                         |                                                                                                                                                                                                                                                                                                                                                                                                                                                                                                                                                                                                                                                                                                                                                                                                                                                                                                                                                                                                                                                                                                                                                                                                                                                                                                                                                                     | unitario       | % incidenza manodopera | TOTALE              |                  |
| 12.1.10                 | Fornitura e posa in opera di strato impermeabilizzante per coperture, con zavorra mobile o rigida, da computarsi a parte, realizzato con manto sintetico in poliolefine flessibile (TPO) ottenuto per co-estrusione con inserimento di velo vetro da 50 g/m <sup>2</sup> come stabilizzatore dimensionale. Il manto sintetico deve essere dotato di elevata resistenza dello strato superiore ai raggi U.V. ed agli agenti atmosferici e dello strato inferiore, al punzonamento ed all'attacco delle radici, deve garantire adattabilità ai movimenti strutturali ed alla flessibilità alle basse temperature. In opera su superfici verticali e orizzontali con sormonti di almeno 7 cm saldati per termofusione, applicato a secco su supporto costituito da uno strato di scorrimento in geotessile non tessuto di tipologia e grammatura da definire ed appesantimento parziale ove richiesto dalla D.L. Sono compresi e compensati nel presente prezzo il tiro in alto, gli sfridi, la piattina in TPO di fissaggio, chiodi e/o viti per il fissaggio della stessa, i risvolti di raccordo con le pareti verticali per un'altezza minima di 20 cm attestati con idoneo profilo in TPO e sigillati con idoneo silicone, gli accessori (bocchettoni, raccordi angoli, etc.) ed ogni altro onere e magistero per dare l'opera compiuta a perfetta regola d'arte. |                |                        |                     |                  |
|                         | 1) spessore 1,5 mm                                                                                                                                                                                                                                                                                                                                                                                                                                                                                                                                                                                                                                                                                                                                                                                                                                                                                                                                                                                                                                                                                                                                                                                                                                                                                                                                                  | m <sup>2</sup> | € 22,24                | 10,80%<br>(€ 2,40)  | 1.245,44<br>euro |
| 23.6.1                  | Tinteggiatura per interni con pittura a tempera a base di resine naturali a dispersione, certificata ecobiocompatibile, composta da acqua, pigmenti minerali, sostanze di riempimento, leganti vegetali. Data in opera su superfici orizzontali o verticali, rette o curve, applicata a pennello o a rullo in due mani, previa pulitura, spolveratura e successivo trattamento delle superfici con idoneo fondo isolante e quanto altro occorre per dare il lavoro compiuto a perfetta regola d'arte.                                                                                                                                                                                                                                                                                                                                                                                                                                                                                                                                                                                                                                                                                                                                                                                                                                                               |                |                        |                     |                  |
|                         |                                                                                                                                                                                                                                                                                                                                                                                                                                                                                                                                                                                                                                                                                                                                                                                                                                                                                                                                                                                                                                                                                                                                                                                                                                                                                                                                                                     | m <sup>2</sup> | € 7,62                 | 30,98%<br>(€ 2,36)  | 1.264 euro       |
| .                       | Arella in cannette di bamboo pelato 2,00 x 5,00 m, spessore 4 - 5 mm legate con filo di nylon prodotto naturale.                                                                                                                                                                                                                                                                                                                                                                                                                                                                                                                                                                                                                                                                                                                                                                                                                                                                                                                                                                                                                                                                                                                                                                                                                                                    |                |                        |                     |                  |
|                         |                                                                                                                                                                                                                                                                                                                                                                                                                                                                                                                                                                                                                                                                                                                                                                                                                                                                                                                                                                                                                                                                                                                                                                                                                                                                                                                                                                     | cad.           | € 18,00                | 20%<br>(€ 3,60)     | 162 euro         |
| 23.2.5                  | Fornitura e posa in opera di intonaco civile per esterni isolante termico ed acustico, deumidificante, anticondensa, a totale assenza di cemento, che lo rendono idoneo per interventi di bioedilizia; conforme alla norma UNI EN 998-1/2010, dello spessore complessivo di 2,5 cm. Composto da un primo strato di rinzafo d'aggrappo traspirante con un diametro massimo dell'inerte di 1,5 mm, a base di calce idraulica, sabbie pure minerali espanse e speciali additivi, dotato di elevata traspirabilità; un secondo strato di intonaco minerale plurifunzione e macroporoso fratazzato applicato con predisposti sesti, a base di calce idraulica, sabbie pure minerali espanse e speciali additivi, farina di sughero o altri inerti leggeri e fibre naturali, presenterà elevate caratteristiche igroscopiche, traspiranti ( $\mu \leq 9$ ), elevate prestazioni di isolamento termico/acustico con conduttività termica di $\lambda \leq 0,057$ W/m <sup>2</sup> K, densità media < 650 Kg/m <sup>3</sup> , dato in opera con macchina intonacatrice. Dato in opera su pareti verticali ed orizzontali compreso l'onere per spigoli ed angoli, ed ogni altro onere e magistero per dare il lavoro finito a perfetta regola d'arte.                                                                                                                        |                |                        |                     |                  |
|                         |                                                                                                                                                                                                                                                                                                                                                                                                                                                                                                                                                                                                                                                                                                                                                                                                                                                                                                                                                                                                                                                                                                                                                                                                                                                                                                                                                                     | m <sup>2</sup> | € 66,45                | 30,30%<br>(€ 20,14) | 5.260,18<br>euro |

| DESIGNAZIONE DEI LAVORI |                                                                                                                                                                                                                                                                                                                                                                                                                                                                                                                                                                                                                                                                                                                                                                                                                                                                                                                                                                                                                                                                                                                                                                                                                                                                                                                                                                                                                                                                                                                                                                                                                                                                                                                                                                                                                                                                                                                                                                                                                                                                                                                                                                                        | IMPORTI  |                           |                     |                  |
|-------------------------|----------------------------------------------------------------------------------------------------------------------------------------------------------------------------------------------------------------------------------------------------------------------------------------------------------------------------------------------------------------------------------------------------------------------------------------------------------------------------------------------------------------------------------------------------------------------------------------------------------------------------------------------------------------------------------------------------------------------------------------------------------------------------------------------------------------------------------------------------------------------------------------------------------------------------------------------------------------------------------------------------------------------------------------------------------------------------------------------------------------------------------------------------------------------------------------------------------------------------------------------------------------------------------------------------------------------------------------------------------------------------------------------------------------------------------------------------------------------------------------------------------------------------------------------------------------------------------------------------------------------------------------------------------------------------------------------------------------------------------------------------------------------------------------------------------------------------------------------------------------------------------------------------------------------------------------------------------------------------------------------------------------------------------------------------------------------------------------------------------------------------------------------------------------------------------------|----------|---------------------------|---------------------|------------------|
|                         |                                                                                                                                                                                                                                                                                                                                                                                                                                                                                                                                                                                                                                                                                                                                                                                                                                                                                                                                                                                                                                                                                                                                                                                                                                                                                                                                                                                                                                                                                                                                                                                                                                                                                                                                                                                                                                                                                                                                                                                                                                                                                                                                                                                        | unitario | % incidenza<br>manodopera | TOTALE              |                  |
| 8.3.1                   | <p>Fornitura e posa in opera di serramenti in legno douglas per finestre e porte-finestre, a vetri, ad una o più ante o a vasistas, costituiti da telaio maestro fisso murato a cemento con sei robuste grappe di ferro su muratura di qualsiasi tipo e di qualsiasi spessore o con contro telaio in abete, e telaio mobile, ancorato al telaio fisso con cerniere del tipo pesante in numero di due per ciascuna anta mobile di finestra ed in numero di tre per ciascuna anta mobile di porta-finestra. Il serramento dovrà garantire le seguenti prestazioni: classe di permeabilità all'aria 4 (UNI EN 12207); classe di tenuta all'acqua 9A (UNI EN 12208); classe di resistenza al vento 5 (UNI EN 12210); trasmittanza termica complessiva U, calcolata secondo il procedimento previsto dalla norma UNI EN 10077-1 non superiore ai valori limite imposti per zona climatica secondo quanto indicato nei D.Lgs. 192/05 e s.m.i; marcatura CE secondo UNI EN 14351-1. Inoltre dovrà garantire un isolamento acustico secondo quanto indicato dal D.P.C.M. pubblicato in G.U. del 22/12/97. Sono compresi e compensati nel prezzo: lo scacciacqua applicato ad incastro a coda di rondine e munito di gocciolatoio, la battentatura (a profilo curvo e a squadra) doppia per i lati verticali e semplice per i lati orizzontali, la battentatura o la guida a canaletto nei riquadri interni per il fissaggio del vetro, i listelli copri filo opportunamente sagomati, cremonesi per chiusura con nasello a richiamo e maniglia in ottone pesante con bacchette incorporate nel legno per le parti a vasistas, asta di manovra con maniglia e compassi in ottone ed eventuale guarnizione in gomma resistente all'invecchiamento ed ai raggi UV per la tenuta termoacustica, nonché la verniciatura con due mani di vernice trasparente, previa mano di antitarmico ed ogni altro onere ed accessorio per dare l'opera completa a perfetta regola d'arte, inclusi i vetri.</p> <p>- Superficie minima di misurazione: 0,9 m².</p> <p>2) con trasmittanza termica complessiva non superiore a 1,5 W/(m²/K) – Sezione 70 mm. con vetro camera 4-6-4 alta efficienza con argon</p> | m²       | € 493,15                  | 6,36%<br>(€ 31,38)  | 5.345,74<br>euro |
| 15.1.2                  | <p>Fornitura e collocazione di lavello da cucina in fire-clay delle dimensioni di 90x45 cm circa con tavola scolapiatti incorporata, completo di pilettoni a griglia in ottone cromato da 1" ¼ con tappo e catenella, i flessibili, sifone a bottiglia, gruppo miscelatore in ottone cromato, le mensole in acciaio smaltato o le spallette in mattoni pieni intonacate, le opere murarie (realizzazione basamento), i collegamenti ai punti di adduzione d'acqua (calda e fredda) e di scarico e ventilazione, già predisposti, e quanto altro occorrente per dare l'opera completa e funzionante a perfetta regola d'arte.</p>                                                                                                                                                                                                                                                                                                                                                                                                                                                                                                                                                                                                                                                                                                                                                                                                                                                                                                                                                                                                                                                                                                                                                                                                                                                                                                                                                                                                                                                                                                                                                       | cad      | € 336,82                  | 20,43%<br>(€ 68,80) | 336,82 euro      |
| 15.1.4                  | <p>Fornitura e collocazione di piatto per doccia in grès porcellanato, con gruppo miscelatore, doccia con braccio tipo saliscendi e diffusore snodabile, piletta a sifone con griglia in ottone compreso rosoni, opere murarie, i collegamenti ai punti di adduzione d'acqua (calda e fredda) e di scarico e ventilazione, già predisposti, e quanto altro occorrente per dare l'opera completa e funzionante a perfetta regola d'arte.</p> <p>2) delle dimensioni di 80x80 cm</p>                                                                                                                                                                                                                                                                                                                                                                                                                                                                                                                                                                                                                                                                                                                                                                                                                                                                                                                                                                                                                                                                                                                                                                                                                                                                                                                                                                                                                                                                                                                                                                                                                                                                                                     | cad      | € 266,18                  | 31,02%<br>(€ 82,56) | 266,18 euro      |
| 15.1.6                  | <p>Fornitura e collocazione di bidet in porcellana vetrificata a pianta ovale delle dimensioni di 58x35 cm, con miscelatore in ottone cromato, sifone ad S e piletta di scarico con tappo a pistone in ottone cromato, i rosoni, i flessibili, l'attacco al pavimento con viti e bulloni cromati, opere murarie, i collegamenti ai punti di adduzione d'acqua (calda e fredda) e di scarico e ventilazione, già predisposti, e quanto altro occorrente per dare l'opera completa e funzionante a perfetta regola d'arte.</p>                                                                                                                                                                                                                                                                                                                                                                                                                                                                                                                                                                                                                                                                                                                                                                                                                                                                                                                                                                                                                                                                                                                                                                                                                                                                                                                                                                                                                                                                                                                                                                                                                                                           | cad      | € 243,12                  | 24,26%<br>(€ 58,97) | 243,12 euro      |

| DESIGNAZIONE DEI LAVORI |                                                                                                                                                                                                                                                                                                                                                                                                                                                                                                                                                                                                                                                                                                                                                                                                                                                            | IMPORTI         |                             |                            |
|-------------------------|------------------------------------------------------------------------------------------------------------------------------------------------------------------------------------------------------------------------------------------------------------------------------------------------------------------------------------------------------------------------------------------------------------------------------------------------------------------------------------------------------------------------------------------------------------------------------------------------------------------------------------------------------------------------------------------------------------------------------------------------------------------------------------------------------------------------------------------------------------|-----------------|-----------------------------|----------------------------|
|                         |                                                                                                                                                                                                                                                                                                                                                                                                                                                                                                                                                                                                                                                                                                                                                                                                                                                            | unitario        | % incidenza manodopera      | TOTALE                     |
| 15.1.8                  | Fornitura e collocazione di vaso igienico in porcellana vetrificata a pianta ovale delle dimensioni di 55x35 cm circa del tipo a cacciata con sifone incorporato, completo di sedile in bachelite con coperchio, compresa la fornitura e collocazione di cassetta esterna di scarico in PVC a zaino con comando a doppio pulsante da 5 e 10 l compreso il pezzo da incasso, i rosini, l'attacco al pavimento con viti e bulloni cromati, le opere murarie, il collegamento al punto di adduzione d'acqua (fredda) e di scarico e ventilazione, già predisposti, e quanto altro occorrente per dare l'opera completa e funzionante a perfetta d'arte.                                                                                                                                                                                                       |                 |                             |                            |
|                         | <b>cad</b>                                                                                                                                                                                                                                                                                                                                                                                                                                                                                                                                                                                                                                                                                                                                                                                                                                                 | <b>€ 245,43</b> | <b>28,03%<br/>(€ 68,80)</b> | <b>245,43 euro</b>         |
| 15.1.3                  | Fornitura e collocazione di lavatoio in grès porcellanato, con scanalature per incastro della tavola, delle dimensioni di 60x50 cm, poggiato su muratura di mattoni, completo di piletta di scarico con tappo e catenella, sifone a scatola ispezionabile, gruppo miscelatore in ottone cromato, opere murarie (realizzazione basamento), i collegamenti ai punti di adduzione d'acqua (calda e fredda) e di scarico e ventilazione, già predisposti, e quanto altro occorrente per dare l'opera completa e funzionante a perfetta regola d'arte.                                                                                                                                                                                                                                                                                                          |                 |                             |                            |
|                         | <b>cad</b>                                                                                                                                                                                                                                                                                                                                                                                                                                                                                                                                                                                                                                                                                                                                                                                                                                                 | <b>€ 278,46</b> | <b>24,71%<br/>(€ 68,80)</b> | <b>278,46 euro</b>         |
| 26.1.8                  | Nolo di ponteggio con sistema a montante e traverso prefabbricato (sistema modulare multidirezionale), costituito in opera compreso i pianali in legno o metallo, le tavole ferma piede, i parapetti, le scale interne di collegamento tra pianale e pianale, gli ancoraggi affinché il ponteggio sia efficacemente assicurato al manufatto almeno in corrispondenza ad ogni due piani dello stesso e ad ogni due montanti, con disposizione di ancoraggio a rombo, compreso la segnaletica, il controllo degli ancoraggi, la manutenzione ed ogni altro onere e magistero per dare la struttura installata nel rispetto della normativa di sicurezza vigente, escluso l'illuminazione.<br>- per ogni m² di ponteggio in opera misurato dalla base e per ciascuno dei successivi mesi o frazione di mese non inferiore a 25 giorni, dopo i primi 30 giorni | <b>m²</b>       | <b>€ 1,86</b>               | <b>27,06%<br/>(€ 0,50)</b> |
|                         |                                                                                                                                                                                                                                                                                                                                                                                                                                                                                                                                                                                                                                                                                                                                                                                                                                                            |                 |                             | <b>182,13 euro</b>         |
| 26.1.9                  | Smontaggio ad opera ultimata di ponteggio di cui alla voce 26.1.8, compreso il carico in cantiere, il trasporto e lo scarico al deposito.<br><br>- per ogni m² di ponteggio in opera misurato dalla base                                                                                                                                                                                                                                                                                                                                                                                                                                                                                                                                                                                                                                                   | <b>m²</b>       | <b>€ 3,39</b>               | <b>77,03%<br/>(€ 2,61)</b> |
|                         |                                                                                                                                                                                                                                                                                                                                                                                                                                                                                                                                                                                                                                                                                                                                                                                                                                                            |                 |                             | <b>331,95 euro</b>         |
| 26.1.10                 | Ponteggio mobile per altezze non superiori a 7,00 m, realizzato con elementi tubolari metallici e provvisto di ruote, di tavole ferma piedi, di parapetti, di scale interne di collegamento tra pianale e pianale, compreso il primo piazzamento, la manutenzione ed ogni altro onere e magistero per dare la struttura installata nel rispetto della normativa di sicurezza vigente. il ponteggio mobile sarà utilizzato solo all'interno, per opere di ristrutturazione, restauro ecc., nel caso in cui la superficie di scorrimento risulta piana e liscia tale da consentirne agevolmente lo spostamento.<br><br>- per ogni m³ e per tutta la durata dei lavori                                                                                                                                                                                        | <b>m³</b>       | <b>€ 15,70</b>              | <b>35,17%<br/>(€ 5,52)</b> |
|                         |                                                                                                                                                                                                                                                                                                                                                                                                                                                                                                                                                                                                                                                                                                                                                                                                                                                            |                 |                             | <b>1.537,34 euro</b>       |

| DESIGNAZIONE DEI LAVORI |                                                                                                                                                                                                                                                                                                                                                                                                                                                                                                                                                                                                                                                                                                                                                                                                                                                                                                                                                                                                                                                                                                                                                                                                                                                                                                                                                                                                                                                                                                                                       | IMPORTI             |                        |                      |                  |
|-------------------------|---------------------------------------------------------------------------------------------------------------------------------------------------------------------------------------------------------------------------------------------------------------------------------------------------------------------------------------------------------------------------------------------------------------------------------------------------------------------------------------------------------------------------------------------------------------------------------------------------------------------------------------------------------------------------------------------------------------------------------------------------------------------------------------------------------------------------------------------------------------------------------------------------------------------------------------------------------------------------------------------------------------------------------------------------------------------------------------------------------------------------------------------------------------------------------------------------------------------------------------------------------------------------------------------------------------------------------------------------------------------------------------------------------------------------------------------------------------------------------------------------------------------------------------|---------------------|------------------------|----------------------|------------------|
|                         |                                                                                                                                                                                                                                                                                                                                                                                                                                                                                                                                                                                                                                                                                                                                                                                                                                                                                                                                                                                                                                                                                                                                                                                                                                                                                                                                                                                                                                                                                                                                       | unitario            | % incidenza manodopera | TOTALE               |                  |
| 24.1.1                  | Fornitura e collocazione di collettore solare per produzione di acqua calda avente le seguenti caratteristiche: superficie lorda da 2,5 m²; superficie di apertura 2,2 m²; superficie effettiva assorbitore da 2,15 m²; assorbitore in rame strutturato per il massimo rendimento con finitura selettiva; assorbimento energetico non inferiore al 95%; emissione non superiore al 5%; tubazioni in rame saldate ad ultrasuoni sulla piastra per il trasferimento del liquido termovettore acqua-glicole collegate a 2 collettori in rame; attacchi idraulici da 1"; isolamento in lana di roccia di spessore non inferiore a 50 mm; isolamento laterale; vasca di contenimento in alluminio stampata in un unico pezzo per garantire affidabilità e tenuta; vetro temperato di sicurezza antiriflesso e antigrandine da almeno 3,2 mm; guarnizione in epdm in unico pezzo; pozzetto in rame per sonda di temperatura; temperatura massima non inferiore a 230 °C; pressione massima di esercizio non inferiore a 10 bar; conforme alle norma EN12975. Compreso il tiro in alto, i mezzi di sollevamento, l'installazione su appositi supporti incluso materiale di fissaggio ed opere murarie, collegamento idraulico, collegamenti elettrici, la prova di tenuta, la pulizia e quanto altro occorra per dare l'opera completa e funzionante a perfetta regola d'arte.<br>2) sistema composto da n. 2 collettori solari installato su copertura piana o inclinata compresa l'installazione del kit relativo su struttura predisposta | cad                 | € 1490,64              | 19,01%<br>(€ 283,31) | 1.490,64<br>euro |
| 24.4.2                  | Fornitura e posa in opera di modulo fotovoltaico in silicio monocristallino, struttura in alluminio anodizzato resistente alla torsione, telaio in vetro con carichi resistenti fino a 5,4 kN/m². Scatola di connessione piastra IP 65, con 3 diodi di by-pass, completa di cavo e connettori multicontact mc Ttype con segno + e -. Numero di celle per modulo: 72. Dimensioni della cella: 125x125 mm². tensione massima di sistema SKII: 1000 Vdc. tensione a vuoto (Voc): da 43,8 V a 44,8 V. tensione a massima potenza (Vmpp): da 35 V a 36,3 V. Corrente di cortocircuito (Isc): da 5 A a 5,5 A. Corrente a massima potenza (Inimp): da 4,58 A a 5,10 A. Caratteristiche termiche: NOCT: 46 °C, TKIsc: 0,036%/K, TK Voc: 0,33%/K. Connettore mc Type4. Classe di protezione: II. tolleranza sulla potenza di picco (solo positiva): 0/+3%. Certificazione: IEC 61215. Resa della cella fotovoltaica: ≥14,9%. Decadimento sulla potenza di picco: ≤ 20% in 25 anni. Garanzia sul prodotto 10 anni o superiore.<br><br>11) 300 Wp                                                                                                                                                                                                                                                                                                                                                                                                                                                                                                | cad                 | € 374,36               | 12,07%<br>(€ 45,20)  | 748,72 euro      |
| 15.2.2                  | Fornitura e posa in opera di serbatoi prefabbricati in P.R.F.V. a fondo bombato,realizzati con resine idonee al contenimento di acqua potabile secondo le norme del D.M. Salute n. 174 del 6/04/2004 e s.m.m.i., da collocare esternamente o se interrati da inglobare in manufatti di conglomerato cementizio da compensare a parte, completi di botola a tenuta stagna a passo d'uomo per consentire l'ispezione e manutenzione e di bocchettoni per il prelievo ed immissione di liquidi. Il serbatoio sarà completo di valvole di arresto di idoneo diametro da collocarsi una all'ingresso sulla tubazione di alimentazione e una all'uscita sulla tubazione di distribuzione, di tubo per troppopieno e piedi di appoggio. All'interno del serbatoio verrà collocato idoneo galleggiante per l'arresto dell'afflusso dei liquidi. Il prezzo è altresì comprensivo di ogni altro onere e magistero occorrente per la esecuzione a perfetta regola d'arte, escluso eventuale basamento.<br><br>1) per capienza 1.000 l                                                                                                                                                                                                                                                                                                                                                                                                                                                                                                            | cad                 | € 1644,11              | 7,31%<br>(€ 120,13)  | 1.644,11<br>euro |
|                         |                                                                                                                                                                                                                                                                                                                                                                                                                                                                                                                                                                                                                                                                                                                                                                                                                                                                                                                                                                                                                                                                                                                                                                                                                                                                                                                                                                                                                                                                                                                                       | TOTALE: 68.089,07 € |                        |                      |                  |
